# Supplementary figures and images for: Genome-Wide Characterization of Salt-Responsive miRNAs, circRNAs and Associated ceRNA Networks in Tomatoes
Source: MDPI journal article supplement (doi:10.3390/ijms222212238), 2021-11-12

A

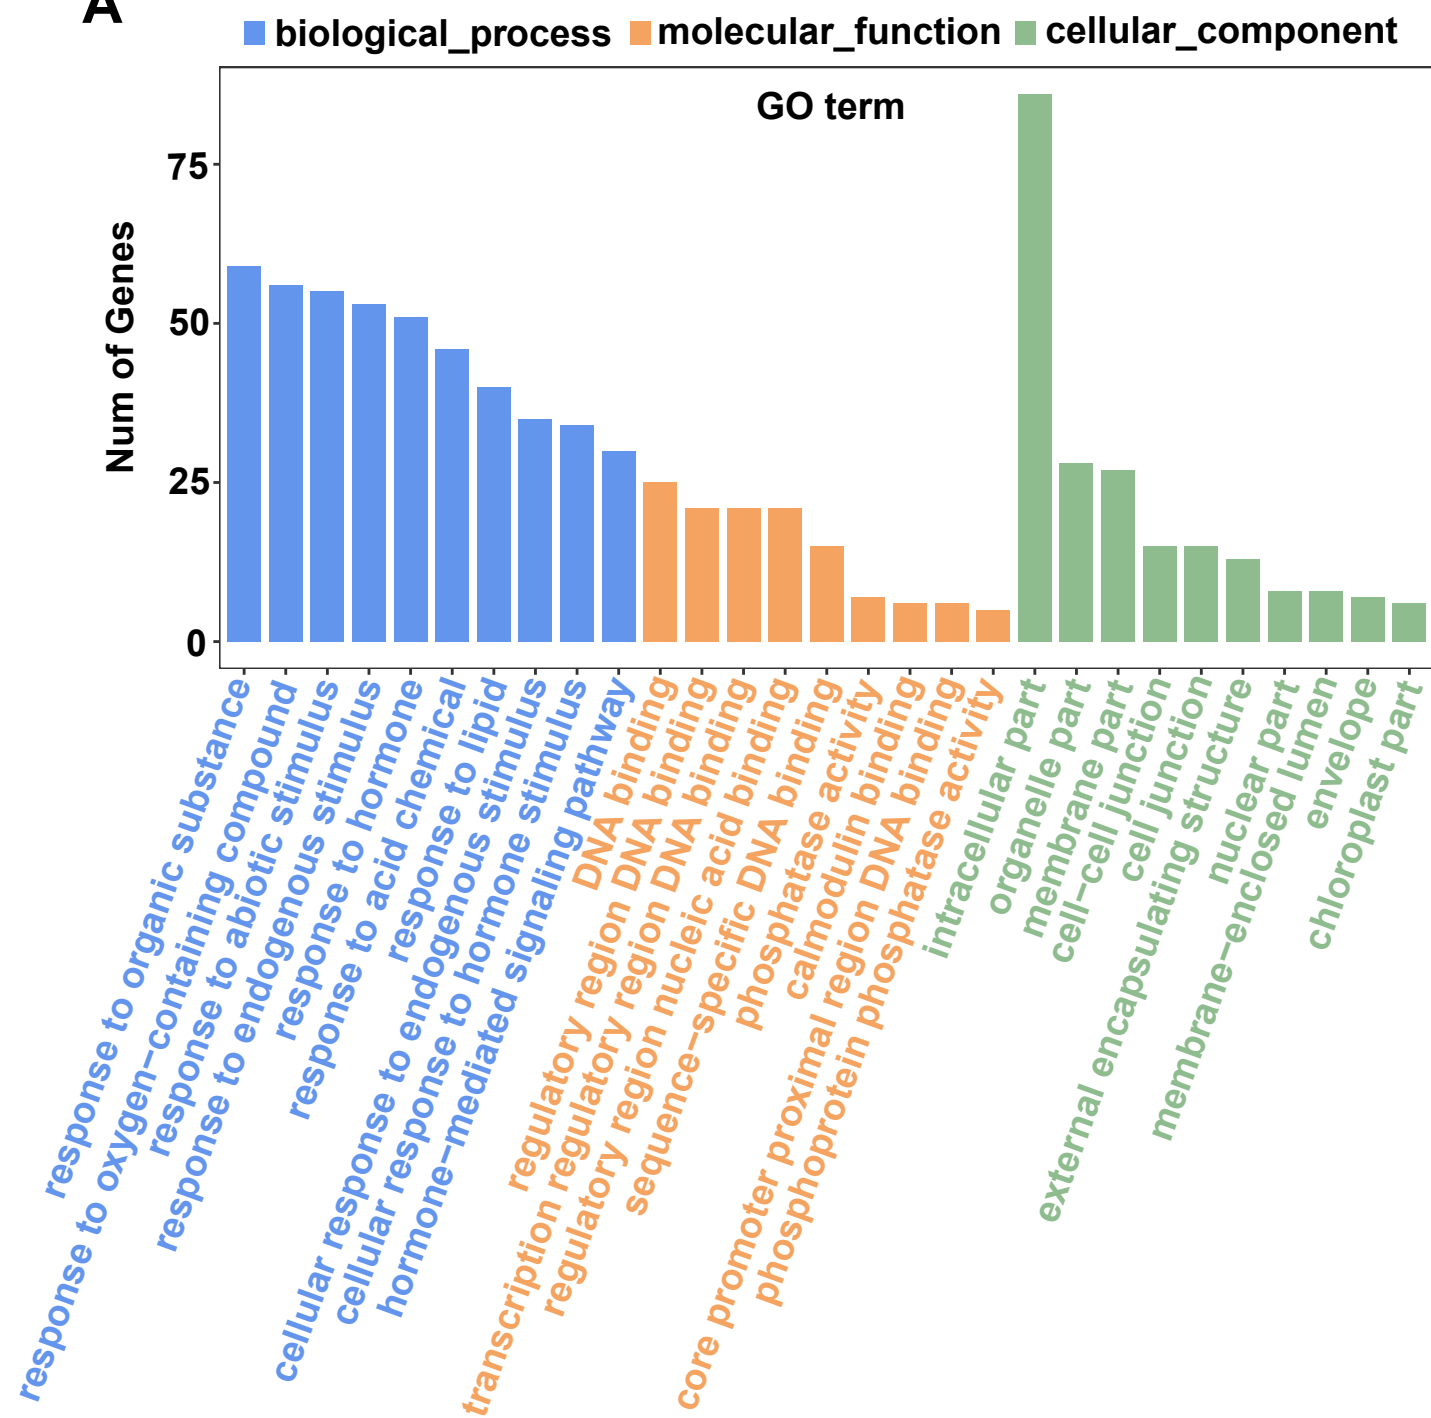

B

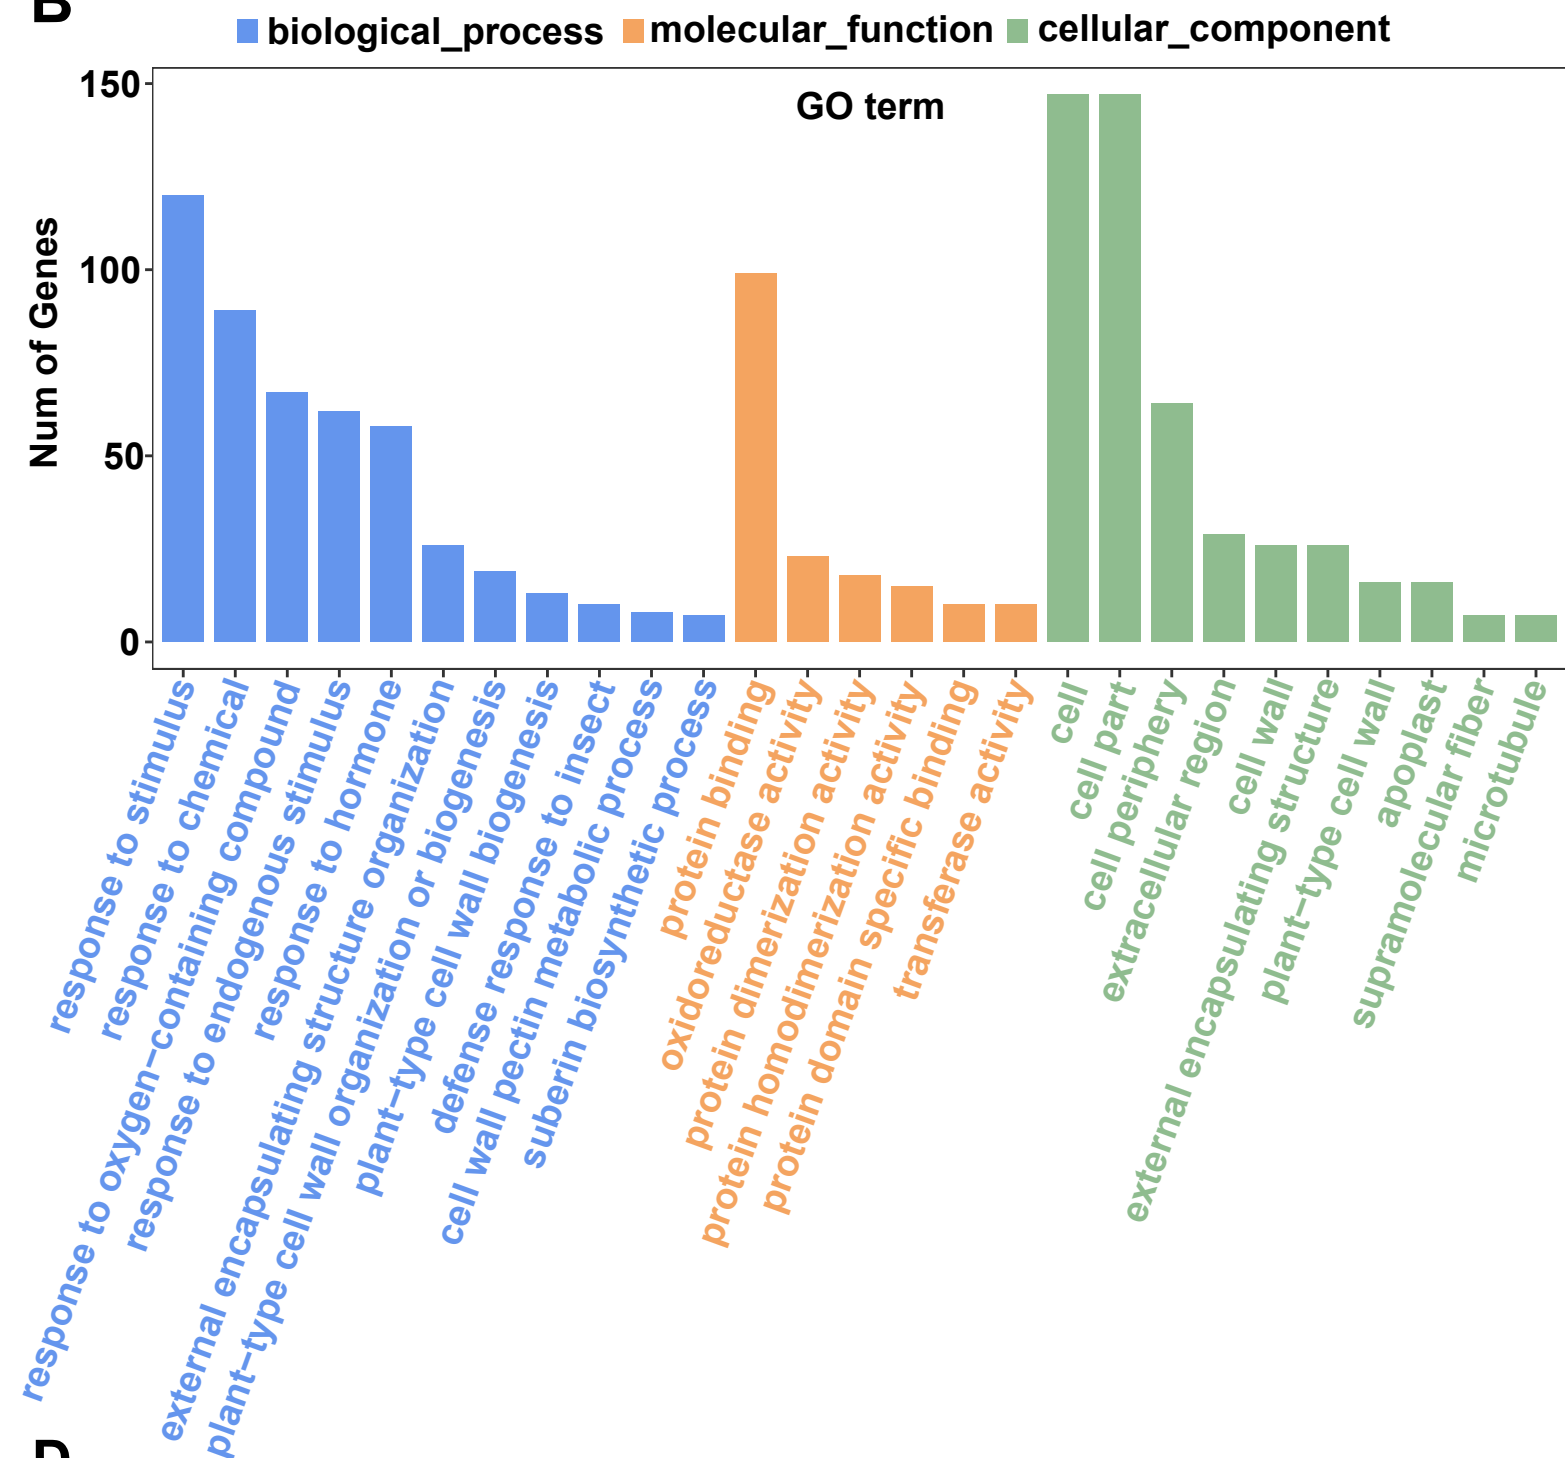

C

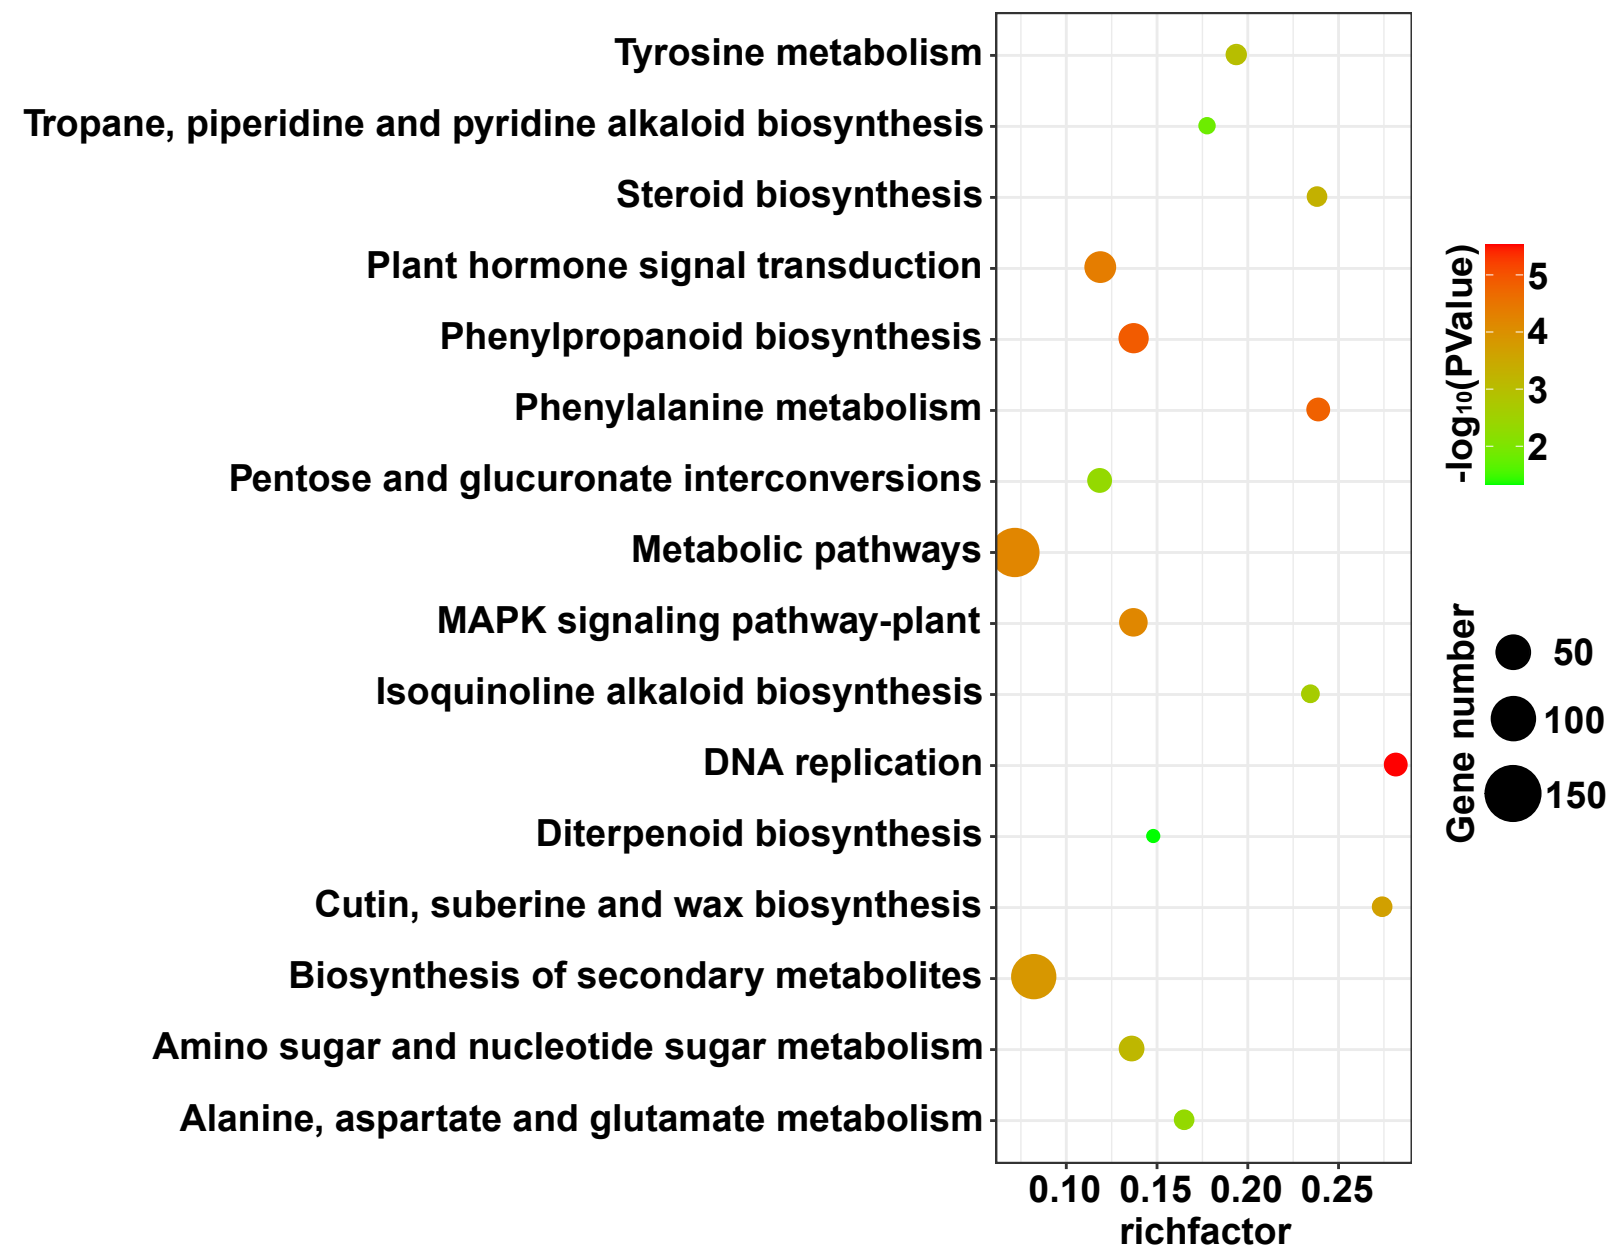

D

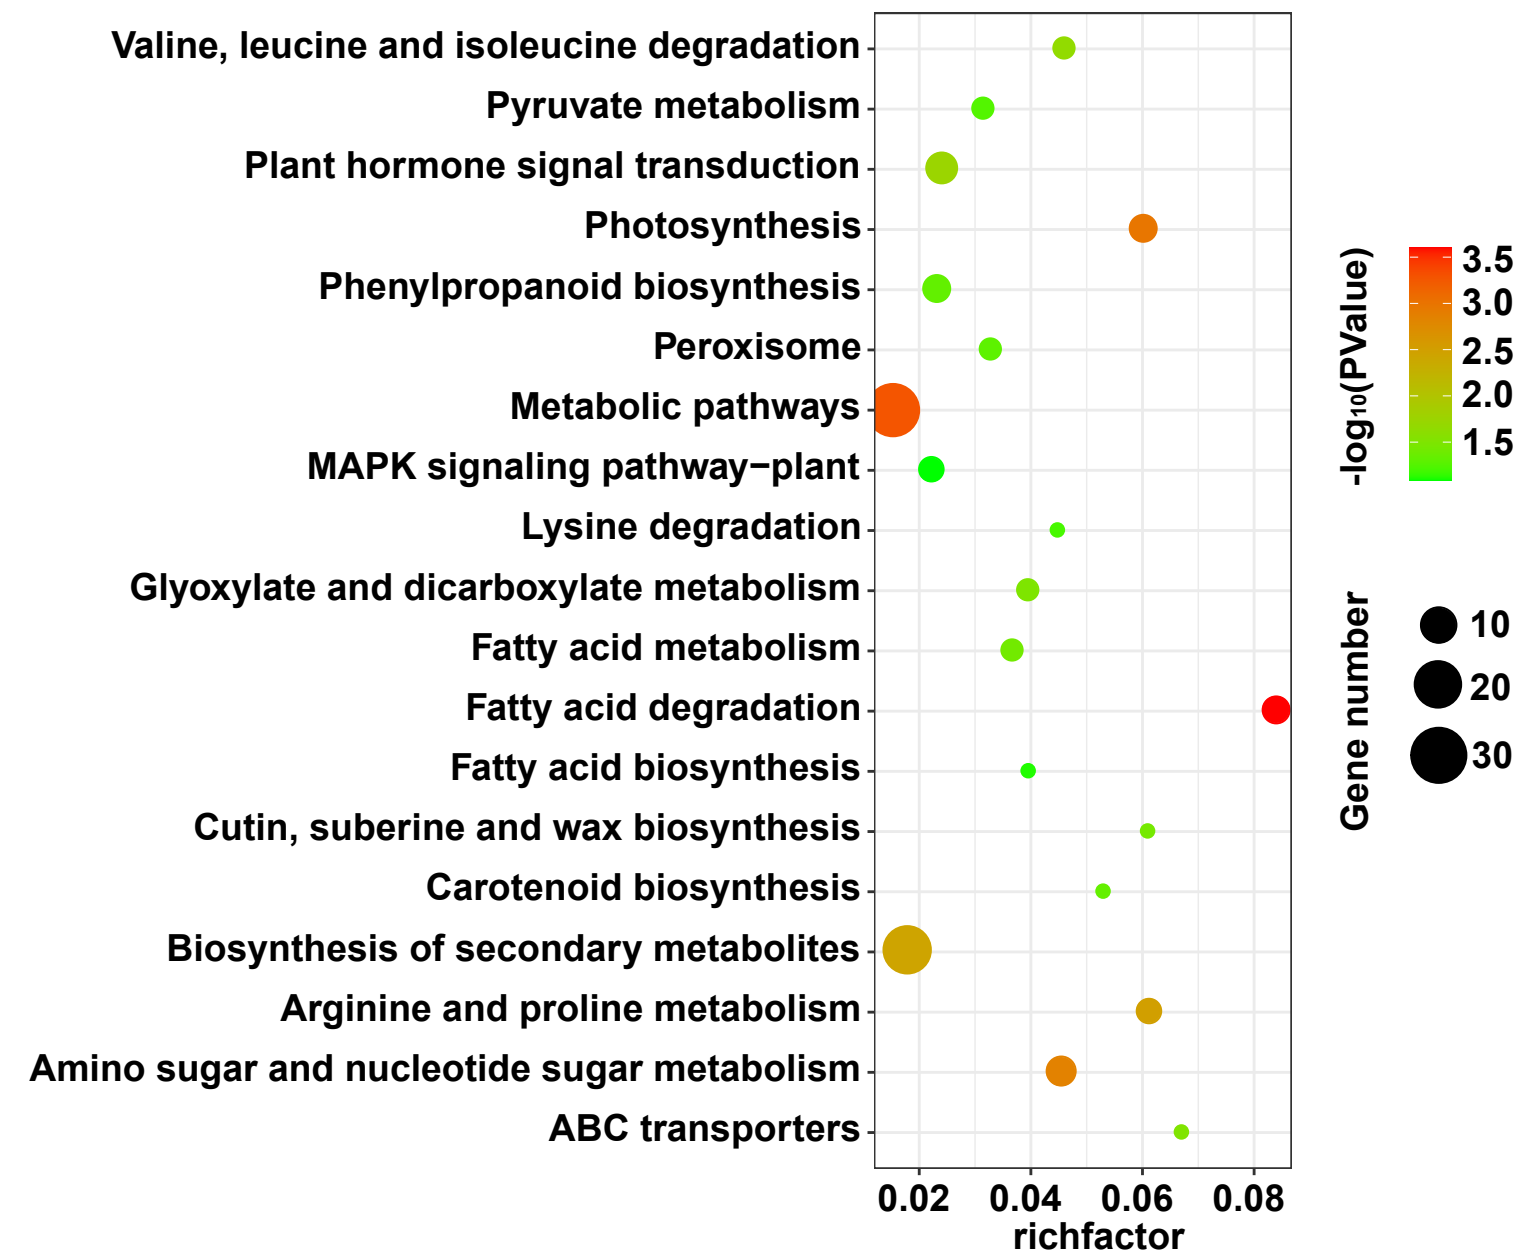

Supplement: s1 [file s1]

A

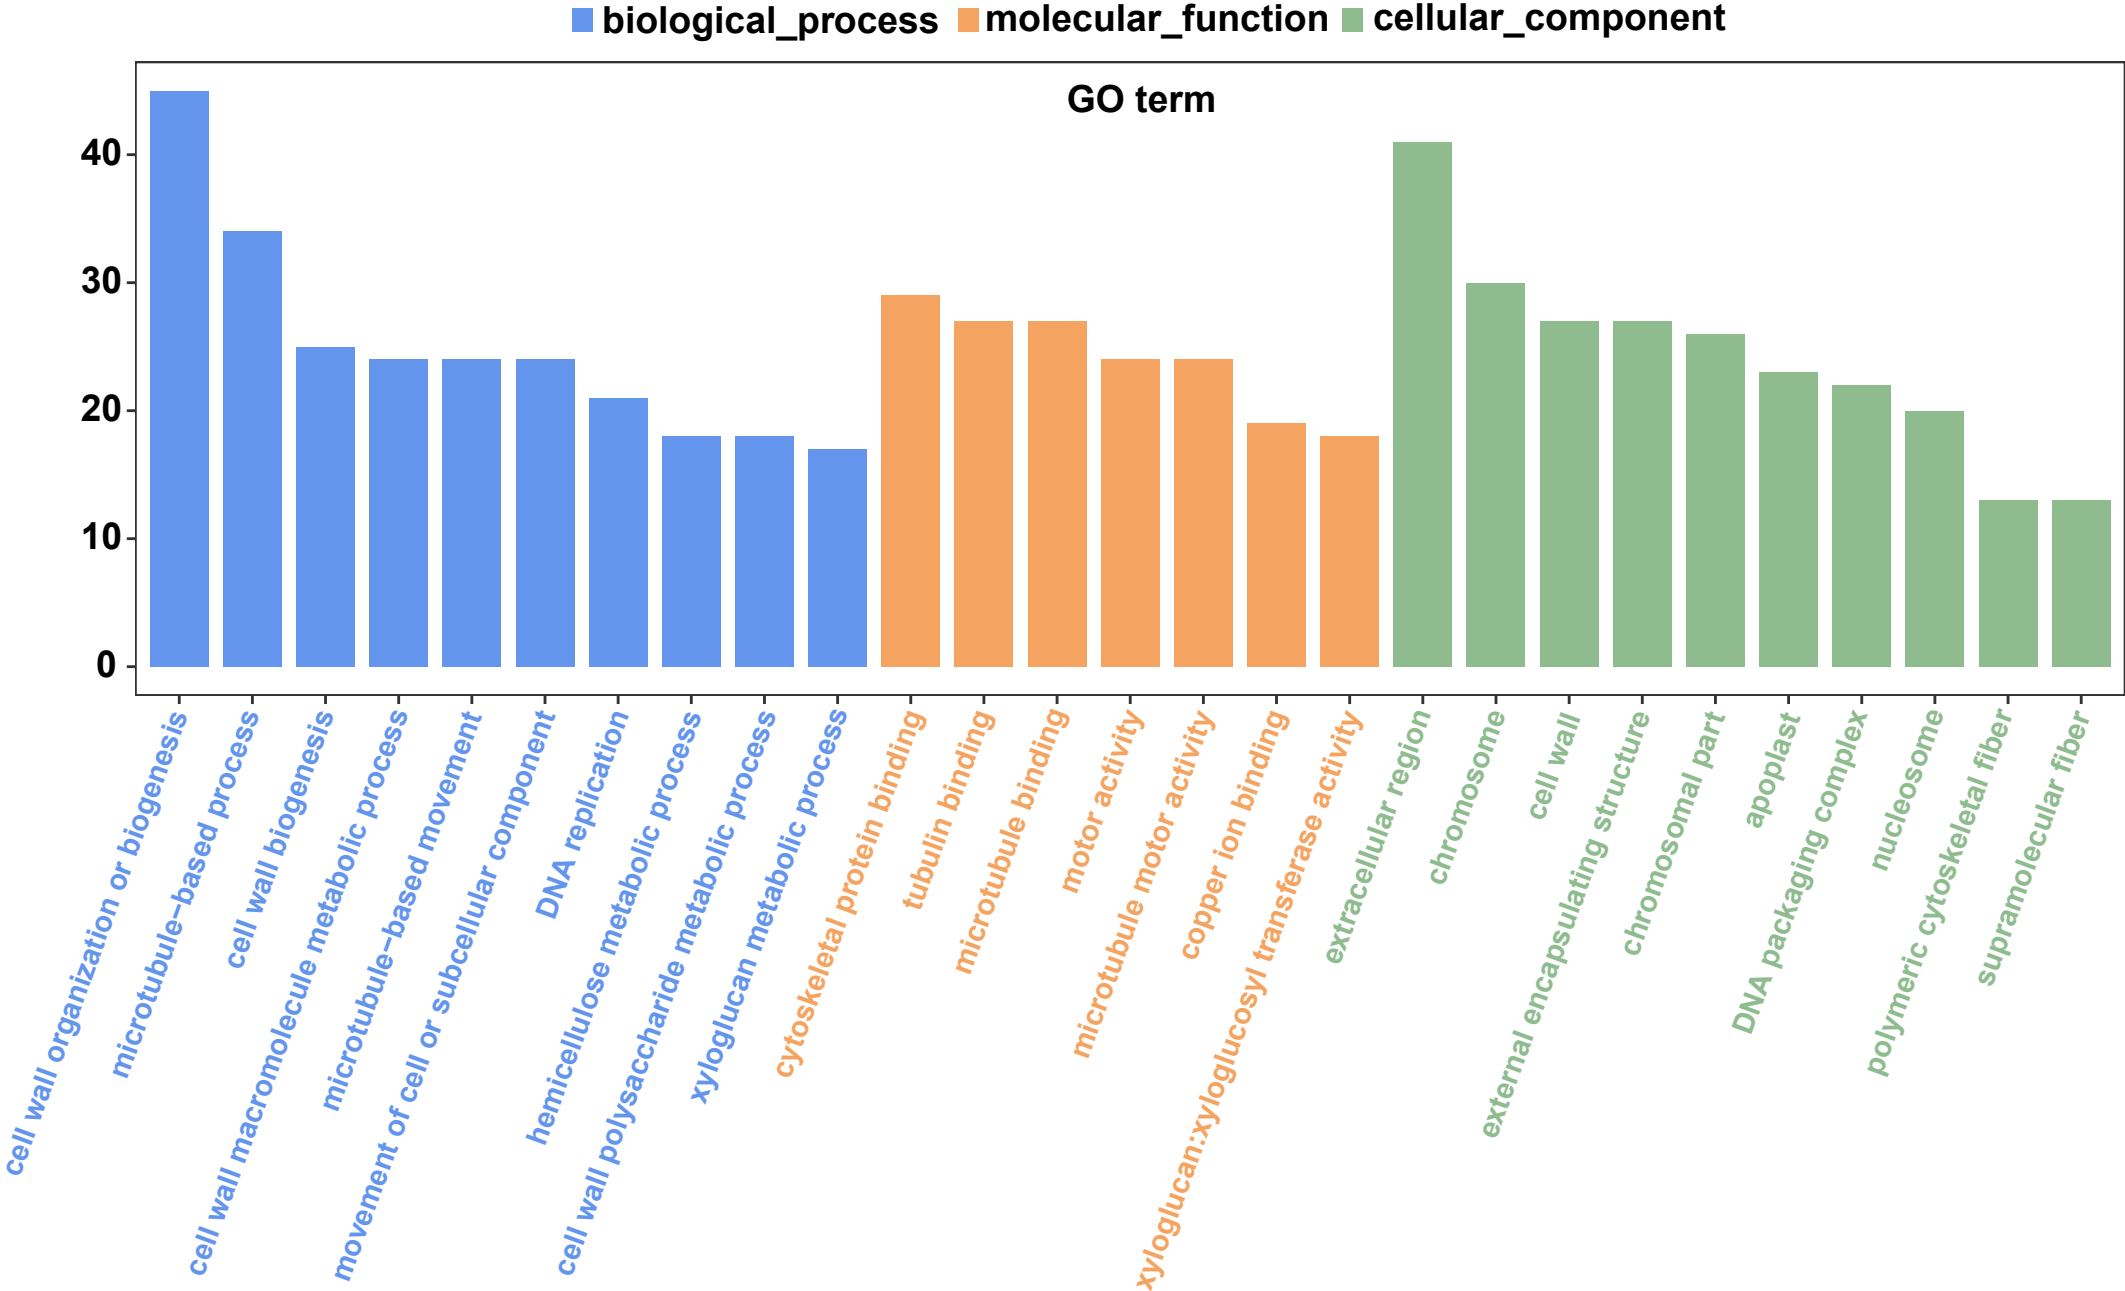

B

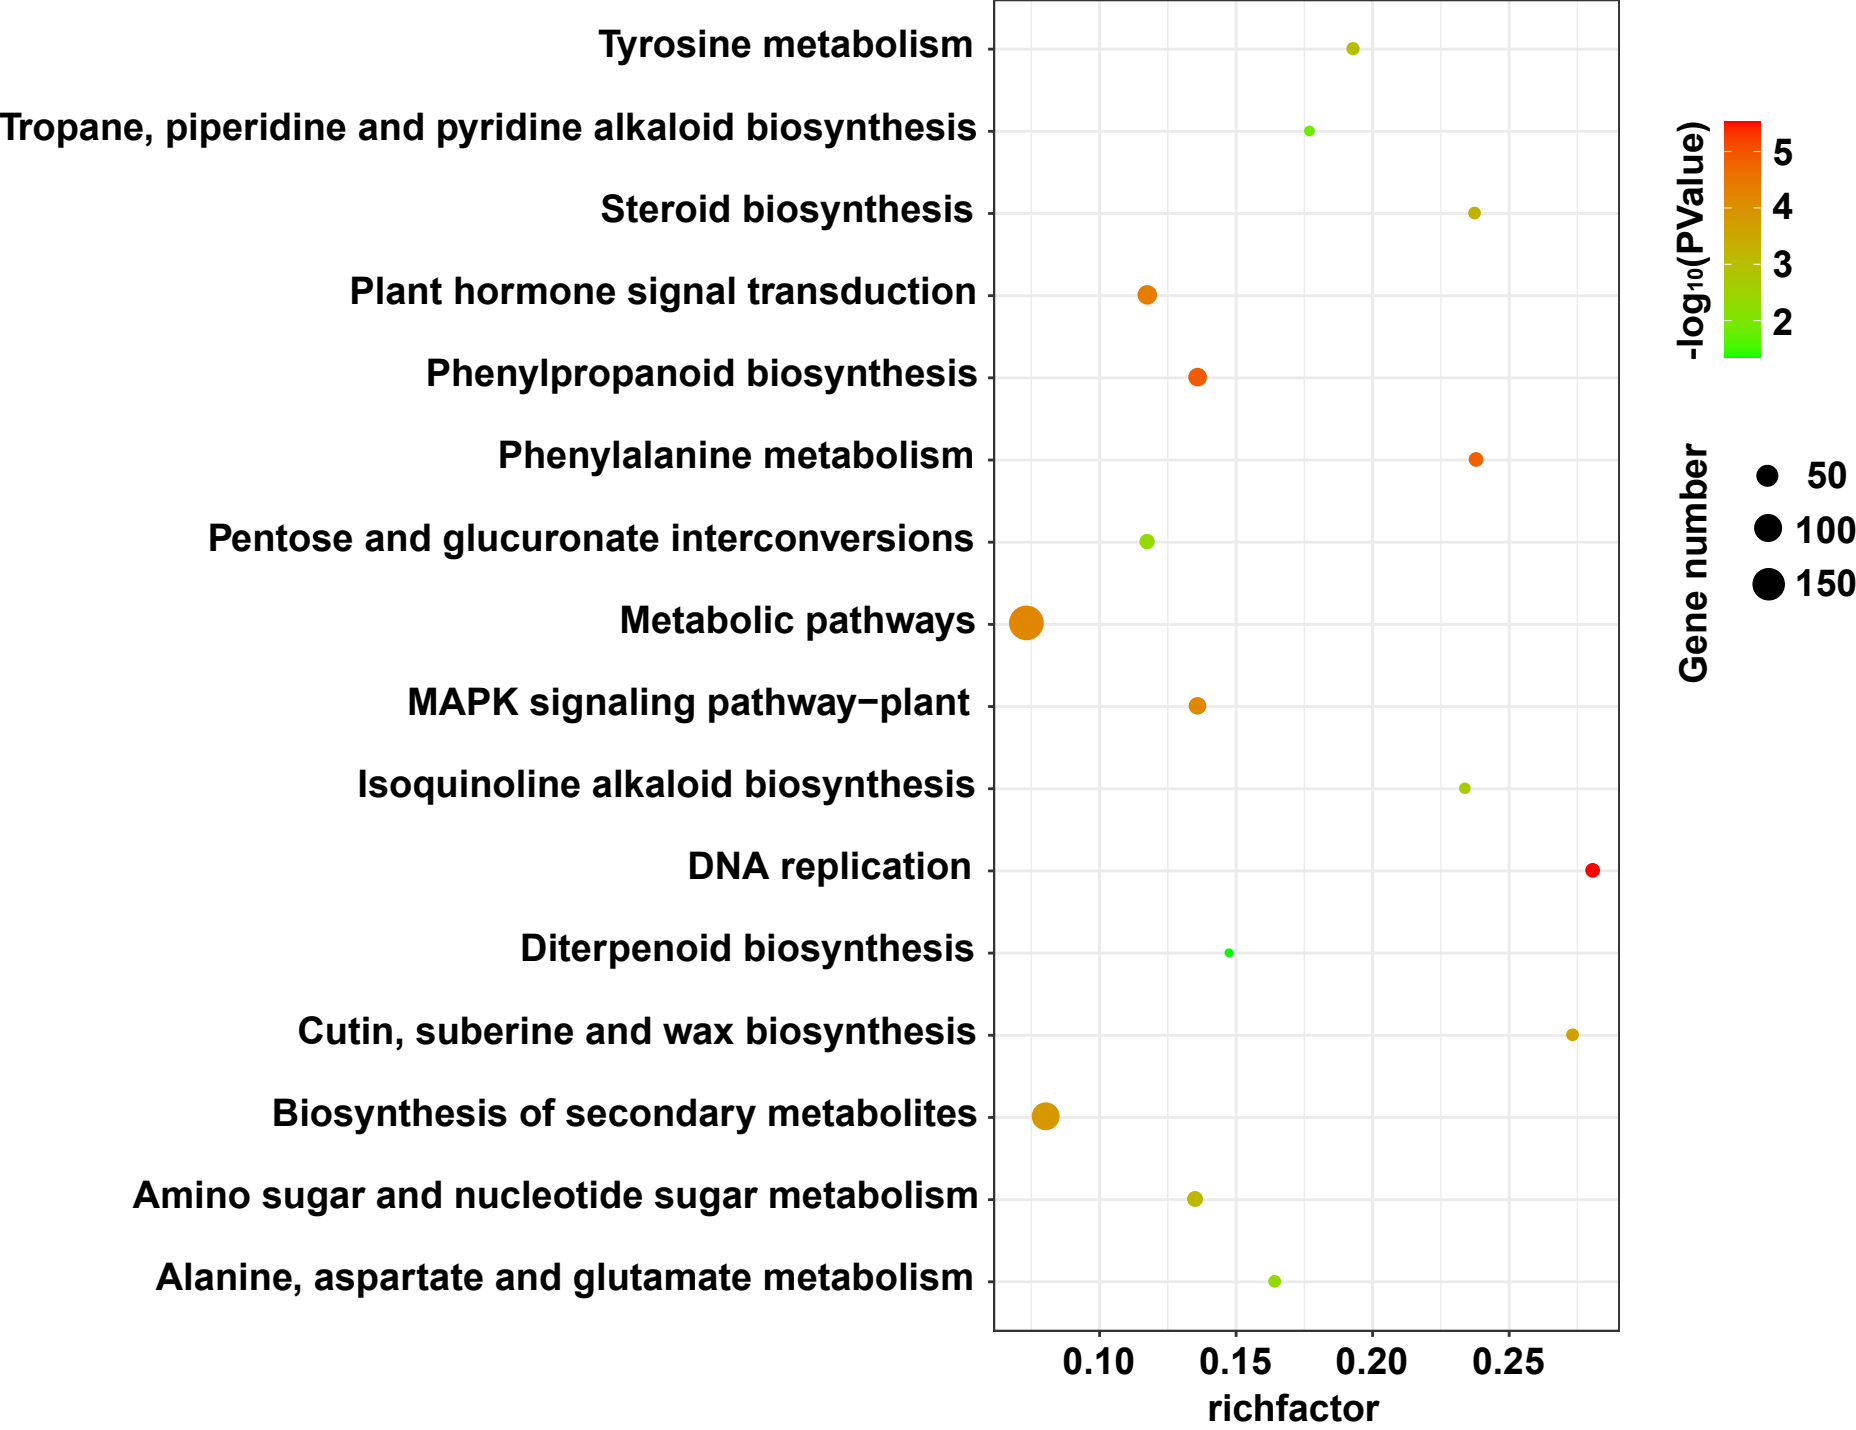

Supplement: s1 [file s1]
